# Supplementary material
Source: bioRxiv or medRxiv preprint supplement (https://medrxiv.org/highwire/filestream/74611/field_highwire_adjunct_files/0/2020.03.27.20045153-1.pdf)
Supplement: Supplementary file [file 2020.03.27.20045153-1.pdf]

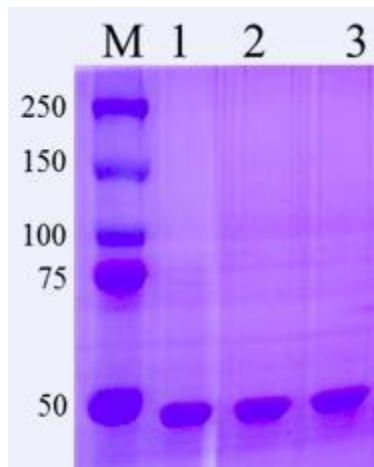

Supplementary figure S1. SDS-PAGE of the purified recombinant nucleocapsid antigen, M band indicates the marker, 1-3 band are the purified recombinant nucleocapsid protein.

Supplementary table 1, Detection difference between different age group, virus load and gender category.

| Group   | Age   | Total | IgM Positive | IgM Positive Rate | IgG Positive | IgG Positive Rate | IgM or IgG Positive | IgM or IgG Positive Rate | Both Positive | Both Positive Rate |
|---------|-------|-------|--------------|-------------------|--------------|-------------------|---------------------|--------------------------|---------------|--------------------|
| CoV     | 0-18  | 12    | 6            | 50.50%            | 6            | 50.00%            | 8                   | 66.67%                   | 3             | 25.00%             |
|         | 18-65 | 61    | 55           | 90.16%            | 54           | 88.52%            | 59                  | 96.72%                   | 50            | 81.97%             |
|         | >65   | 6     | 5            | 83.33%            | 5            | 83.33%            | 5                   | 83.33%                   | 5             | 83.33%             |
| Control | 0-18  | 2     | 1            | 50.00%            | 0            | 0.00%             | 0                   | 0.00%                    | 0             | 0.00%              |
|         | 18-65 | 74    | 20           | 27.03%            | 2            | 2.70%             | 14                  | 18.92%                   | 1             | 1.35%              |
|         | >65   | 4     | 2            | 50.00%            | 0            | 0.00%             | 1                   | 25.00%                   | 0             | 0.00%              |

| CT Value (CoV) | Total | IgM Positive | IgM Positive Rate | IgG Positive | IgG Positive Rate | IgM/IgG Positive | IgM or IgG Positive Rate | Both Positive | Both Positive Rate |
|----------------|-------|--------------|-------------------|--------------|-------------------|------------------|--------------------------|---------------|--------------------|
| <30            | 31    | 24           | 77.42%            | 24           | 77.42%            | 28               | 90.32%                   | 20            | 62.07%             |
| ≥30            | 48    | 41           | 85.42%            | 41           | 85.42%            | 44               | 91.67%                   | 38            | 79.17%             |

| Group   | Gender | Total | IgM/IgG Positive | IgM/IgG Positive Rate | IgM Positive | IgM Positive Rate | IgG Positive | IgG Positive Rate | Both Positive | Both Positive Rate |
|---------|--------|-------|------------------|-----------------------|--------------|-------------------|--------------|-------------------|---------------|--------------------|
| CoV     | Male   | 28    | 25               | 89.29%                | 23           | 82.14%            | 24           | 85.71%            | 22            | 78.57%             |
|         | Female | 51    | 47               | 92.16%                | 42           | 82.35%            | 41           | 80.39%            | 36            | 70.59%             |
| Control | Male   | 38    | 8                | 21.05%                | 8            | 21.05%            | 1            | 2.63%             | 0             | 0.00%              |
|         | Female | 42    | 7                | 16.67%                | 7            | 16.67%            | 1            | 2.38%             | 1             | 2.38%              |

Supplementary table S2, Individual characteristics, RT-PCR CT values and RLU values for these COVID-79 participants

| Patient Number | Gender | Age | IgM RLU | IgG RLU  | CT value | Days after onset | IgM <sup>a</sup> positive | IgG positive |
|----------------|--------|-----|---------|----------|----------|------------------|---------------------------|--------------|
| 1              | M      | 70  | 80971   | 52599    | 34       | 10               | 0                         | 0            |
| 2              | M      | 61  | 1477140 | 2395865  | 29       | 13               | 1                         | 1            |
| 3              | F      | 62  | 168753  | 19453477 | 30.42    | 17               | 1                         | 1            |
| 4              | M      | 62  | 271301  | 5484206  | 33       | 26               | 1                         | 1            |
| 5              | M      | 57  | 417475  | 29131806 | 22       | 18               | 1                         | 1            |
| 6              | F      | 25  | 384578  | 6136972  | 35.5     | 15               | 1                         | 1            |
| 7              | F      | 52  | 368950  | 5444600  | 31.8     | 16               | 1                         | 1            |
| 8              | F      | 38  | 2262102 | 10652447 | 34       | 16               | 1                         | 1            |
| 9              | F      | 25  | 765993  | 8428303  | 33.9     | 14               | 1                         | 1            |
| 10             | M      | 32  | 1081603 | 29054721 | 33.65    | 18               | 1                         | 1            |
| 11             | F      | 57  | 316058  | 29976650 | 22.48    | 17               | 1                         | 1            |
| 12             | M      | 13  | 98456   | 396829   | 22.48    | 8                | 0                         | 1            |
| 13             | M      | 50  | 185345  | 683910   | 33.436   | 8                | 1                         | 1            |
| 14             | F      | 45  | 184170  | 7042111  | 32       | 9                | 1                         | 1            |
| 15             | F      | 60  | 1444659 | 26502728 | 32       | 14               | 1                         | 1            |
| 16             | F      | 6   | 79482   | 183712   | 29.21    | 11               | 0                         | 0            |
| 17             | M      | 41  | 2965294 | 41722667 | 34       | 15               | 1                         | 1            |
| 18             | F      | 59  | 236113  | 4531207  | 33.71    | 14               | 1                         | 1            |
| 19             | F      | 35  | 154449  | 1150947  | 19.13    | 14               | 0                         | 1            |
| 20             | F      | 59  | 455171  | 1809963  | 19.13    | 10               | 1                         | 1            |

|    |   |    |          |          |       |    |   |   |
|----|---|----|----------|----------|-------|----|---|---|
| 21 | F | 52 | 145120   | 4720157  | 30    | 15 | 0 | 1 |
| 22 | M | 54 | 1000038  | 7831131  | 30    | 20 | 1 | 1 |
| 23 | F | 31 | 701172   | 109644   | 30.2  | 13 | 1 | 0 |
| 24 | M | 36 | 251312   | 467861   | 31.7  | 11 | 1 | 1 |
| 25 | F | 64 | 443975   | 8818590  | 24.27 | 26 | 1 | 1 |
| 26 | M | 69 | 1335220  | 10498915 | 24.95 | 27 | 1 | 1 |
| 27 | F | 47 | 512775   | 10845114 | 29    | 16 | 1 | 1 |
| 28 | F | 66 | 1188339  | 16133818 | 32.48 | 15 | 1 | 1 |
| 29 | F | 35 | 157618   | 249403   | 25.66 | 12 | 0 | 0 |
| 30 | F | 75 | 781790   | 8168004  | 31.27 | 20 | 1 | 1 |
| 31 | F | 59 | 1812884  | 20385378 | 33.02 | 15 | 1 | 1 |
| 32 | F | 46 | 337203   | 12124503 | 32.26 | 13 | 1 | 1 |
| 33 | F | 53 | 609863   | 2972104  | 33    | 15 | 1 | 1 |
| 34 | F | 7  | 144880   | 62823    | 32.26 | 10 | 0 | 0 |
| 35 | F | 33 | 189317   | 157491   | 37.08 | 13 | 1 | 0 |
| 36 | M | 41 | 733129   | 4712207  | 37.8  | 16 | 1 | 1 |
| 37 | M | 31 | 985065   | 9436409  | 33.51 | 6  | 1 | 1 |
| 38 | F | 25 | 180265   | 276565   | 28.5  | 10 | 1 | 0 |
| 39 | F | 50 | 18339823 | 149512   | 28.5  | 9  | 1 | 0 |
| 40 | M | 47 | 2706952  | 7777156  | 28.5  | 11 | 1 | 1 |
| 41 | F | 59 | 6051514  | 4623921  | 28.5  | 12 | 1 | 1 |
| 42 | M | 43 | 1645123  | 8785198  | 27.7  | 12 | 1 | 1 |
| 43 | M | 61 | 469261   | 6220607  | 20.81 | 15 | 1 | 1 |
| 44 | F | 40 | 121633   | 449168   | 36.66 | 21 | 0 | 1 |
| 45 | M | 13 | 167170   | 400283   | 30.7  | 5  | 1 | 1 |
| 46 | F | 7  | 210478   | 125352   | 26.06 | 4  | 1 | 0 |
| 47 | M | 3  | 113335   | 134332   | 32.3  | 4  | 0 | 0 |
| 48 | F | 8  | 810384   | 2436678  | 31.59 | 6  | 1 | 1 |
| 49 | F | 2  | 146829   | 157475   | 30.91 | 7  | 0 | 0 |
| 50 | F | 4  | 212328   | 73734    | 31.03 | 7  | 1 | 0 |
| 51 | F | 64 | 994670   | 7167664  | 34.72 | 18 | 1 | 1 |
| 52 | M | 38 | 72095    | 526072   | 34.72 | 14 | 0 | 1 |
| 53 | F | 49 | 179064   | 1675446  | 33.96 | 21 | 1 | 1 |
| 54 | F | 51 | 941384   | 11680331 | 32.57 | 16 | 1 | 1 |
| 55 | F | 65 | 225949   | 1292217  | 30.5  | 15 | 1 | 1 |
| 56 | F | 56 | 190128   | 993915   | 20.37 | 13 | 1 | 1 |
| 57 | M | 53 | 1312888  | 5214239  | 20.37 | 25 | 1 | 1 |
| 58 | F | 67 | 1050109  | 11959362 | 33.8  | 16 | 1 | 1 |
| 59 | F | 61 | 4049852  | 11136619 | 28.07 | 19 | 1 | 1 |
| 60 | M | 42 | 2147272  | 8426786  | 29.92 | 12 | 1 | 1 |

|    |   |    |         |          |       |    |   |   |
|----|---|----|---------|----------|-------|----|---|---|
| 61 | M | 42 | 51230   | 97601    | 27.93 | 40 | 0 | 0 |
| 62 | F | 17 | 108135  | 436999   | 35.8  | 12 | 0 | 1 |
| 63 | M | 45 | 1170532 | 2313379  | 39.8  | 15 | 1 | 1 |
| 64 | M | 41 | 797046  | 10476570 | 39.8  | 15 | 1 | 1 |
| 65 | F | 37 | 2310518 | 4461922  | 27.18 | 15 | 1 | 1 |
| 66 | F | 60 | 172308  | 1234272  | 34    | 10 | 1 | 1 |
| 67 | F | 78 | 166974  | 10898820 | 34    | 18 | 1 | 1 |
| 68 | M | 32 | 3135055 | 4498781  | 34    | 12 | 1 | 1 |
| 69 | M | 57 | 175937  | 155652   | 28.75 | 12 | 1 | 0 |
| 70 | F | 10 | 205838  | 1364935  | 35    | 14 | 1 | 1 |
| 71 | F | 3  | 110323  | 1165381  | 27.57 | 13 | 0 | 0 |
| 72 | M | 25 | 1230325 | 6840152  | 30    | 19 | 1 | 1 |
| 73 | F | 50 | 245103  | 550685   | 36.4  | 12 | 1 | 1 |
| 74 | F | 28 | 1827691 | 4477952  | 33.67 | 10 | 1 | 1 |
| 75 | M | 49 | 661646  | 5016271  | 34.5  | 1  | 1 | 1 |
| 76 | F | 25 | 974965  | 4071857  | 33    | 3  | 1 | 1 |
| 77 | F | 43 | 1864158 | 4250074  | 27.6  | 1  | 1 | 1 |
| 78 | F | 23 | 311772  | 4167975  | 24.4  | 5  | 1 | 1 |
| 79 | F | 57 | 213588  | 3963082  | 32.6  | 3  | 1 | 1 |

<sup>a</sup> For the IgM and IgG positive columns, “1” indicates positive detection by our chemiluminescence method, while “0” depicts negative. The cutoff was set based on the ROC analysis.
